# Supplementary material for: Dephosphorylation of 4EBP1/2 Induces Prenatal Neural Stem Cell Quiescence
Source: PubMed Central journal article supplement — bioRxiv. 2023 Feb 15:2023.02.14.528513. Preprint. [Version 1] doi: 10.1101/2023.02.14.528513 (PMC9948964; doi:10.1101/2023.02.14.528513), 2023-02-15
Supplement: media-1.pdf [file media-1.pdf]

A.

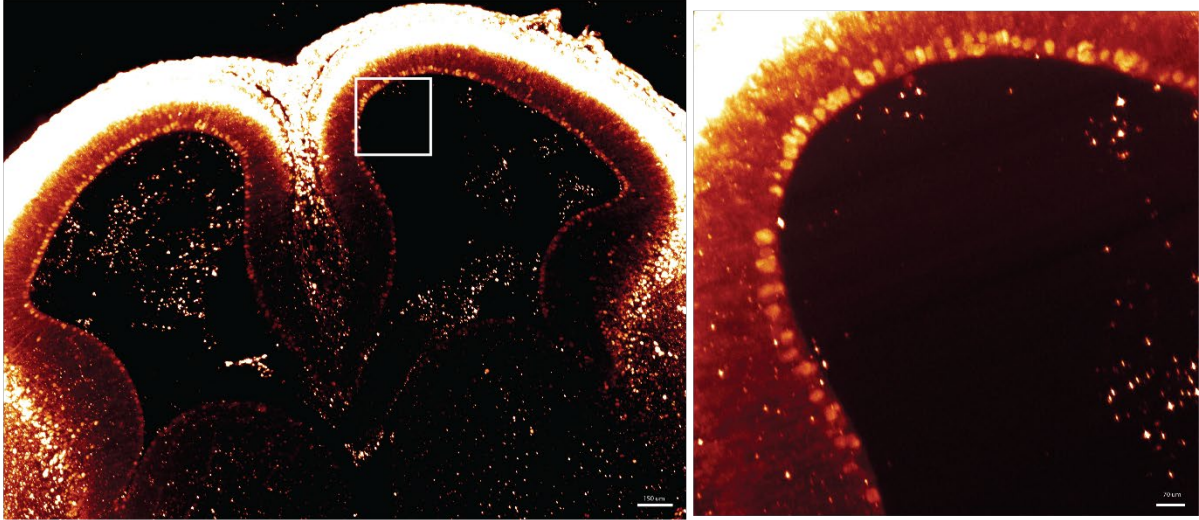

B.

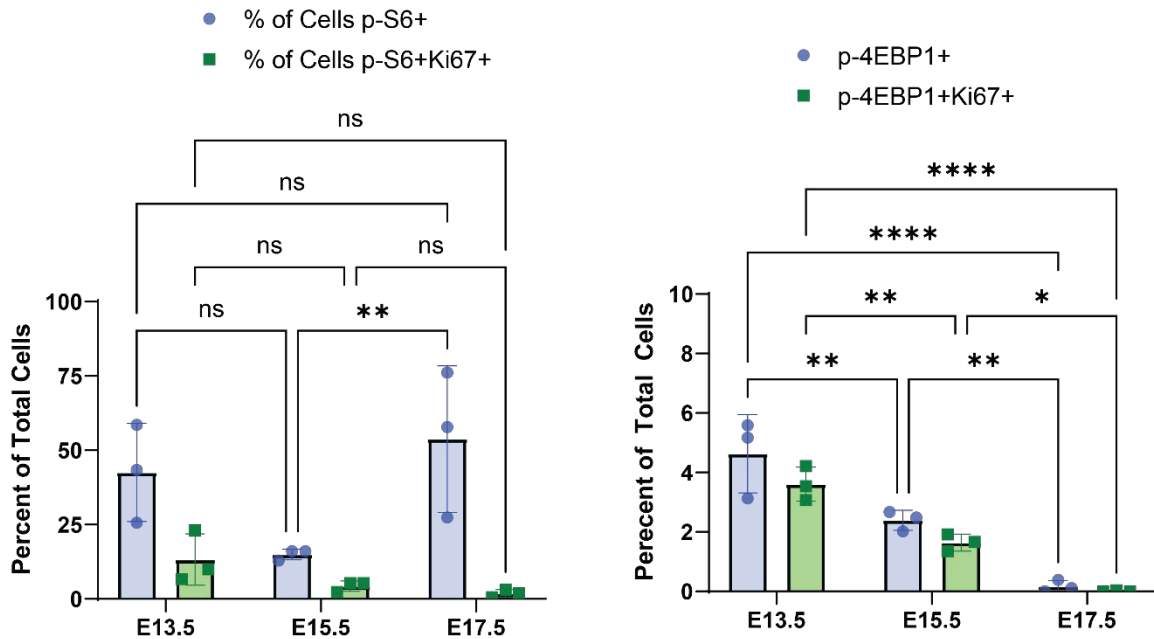

152

153

154

155

156

157

158

**Extended Figure 1-1: Additional staining of mTOR during neurogenesis.** (A) iDISCO+-tissue cleared whole brain from an E13.5 mouse embryo (15X) Ki67 positive cells lining the surface of the ventricular-subventricular zone tissue and in the developing cortex (inset). (B) Plots showing the quantification of mTOR signaling throughout neurogenesis. 2 way ANOVA with Tukey's multiple comparisons test: percent of p-S6 positive cells: E13.5 versus E15.5  $p = 0.0501$ , E15.5 versus E17.5  $p = 0.0071$ , E13.5 versus E17.5  $p = 0.5377$ ; percent of p-S6 and Ki67 positive cells: E13.5 versus E15.5  $p = 0.6704$ , E15.5 versus E17.5  $p =$

159 0.9697, E13.5 versus E17.5  $p = 0.5301$ ). (C) The percent of all cells positive for p-4EBP1 T37/46 (green) and  
160 cells co-positive for p-4EBP1 and Ki67 (red) (bottom). (2 way ANOVA with Tukey's multiple comparisons  
161 test: percent of p-4EBP1 positive cells: E13.5 versus E15.5  $p = 0.0022$ , E15.5 versus E17.5  $p = 0.0023$ , E13.5  
162 versus E17.5  $p < 0.0001$ ; percent of p-4EBP1 and Ki67 positive cells: E13.5 versus E15.5  $p = 0.0056$ , E15.5  
163 versus E17.5  $p = 0.0184$ , E13.5 versus E17.5  $p < 0.0001$ ). Error bars represent standard deviation.

164

A.

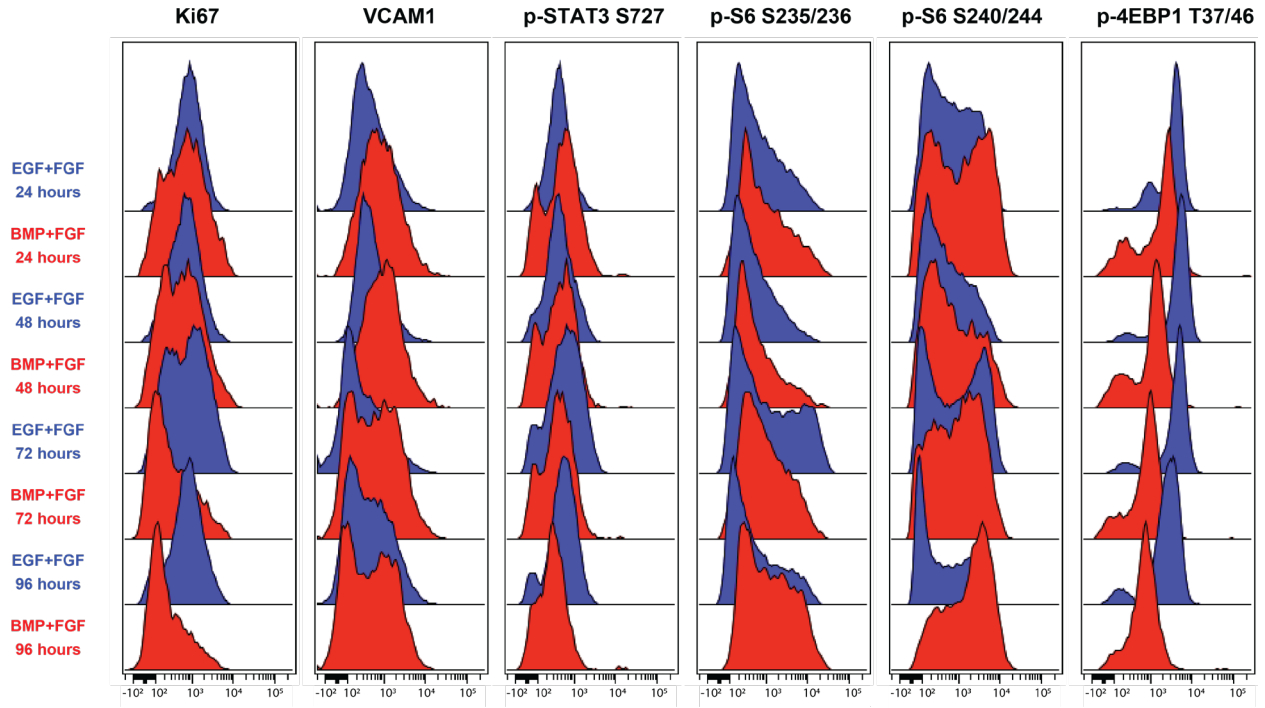

166 **Extended Figure 2-1: Quiescence entry time course.** (A) Representative histograms of proliferation  
167 markers and effectors downstream of mTOR in E15.5 NSCs cultured for 24, 48, 72, and 96 hours with  
168 media containing either EGF/FGF (blue) or BMP4/FGF (red).

169

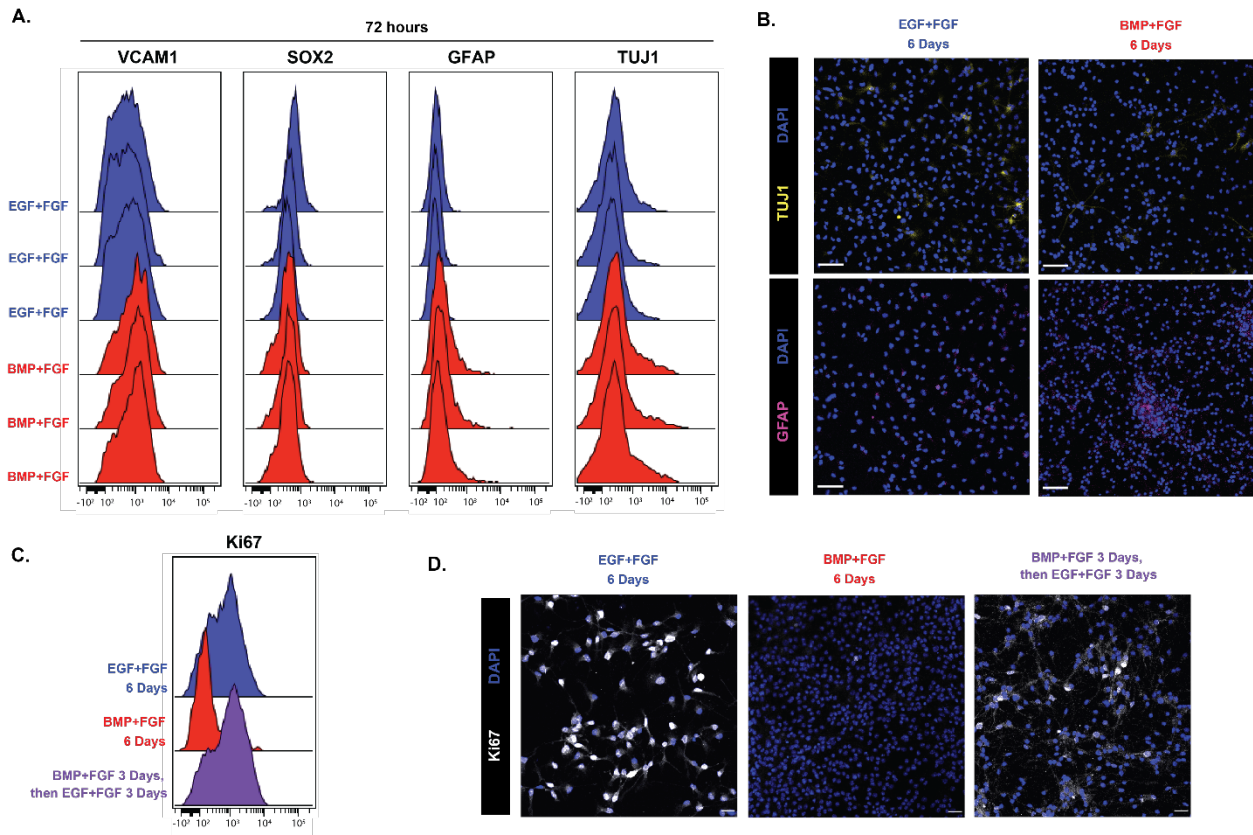

170

171 **Extended Figure 2-2: BMP4 transiently induces quiescence, but not differentiation.** (A) 3 replicates of  
 172 E15.5 NSCs cultured for 72 hours with media containing either EGF/FGF (blue) or BMP4/FGF (red) stained  
 173 for VCAM1, Sox2, GFAP, and TUJ1. (B) 20X representative images of E15.5 NSCs cultured for 6 days with  
 174 media containing either EGF/FGF (left) or BMP4/FGF (right) stained for TUJ1 (top, yellow), GFAP (bottom,  
 175 pink), and DAPI (blue). Scale bars = 50  $\mu$ m. (C) Histogram overlays of E15.5 NSCs cultured for 6 days with  
 176 media containing EGF/FGF (blue), 6 days with media containing BMP4/FGF (red), and 3 days in BMP4/FGF  
 177 followed by 3 days back in EGF/FGF (purple). (D) Representative 20X images of E15.5 NSCs cultured for 6  
 178 days with media containing EGF/FGF (left), 6 days with media containing BMP4/FGF (center), and 3 days  
 179 in BMP4/FGF followed by 3 days back in EGF/FGF (right) stained for Ki67 (white) and DAPI (blue). Scale  
 180 bars = 20  $\mu$ m.

181

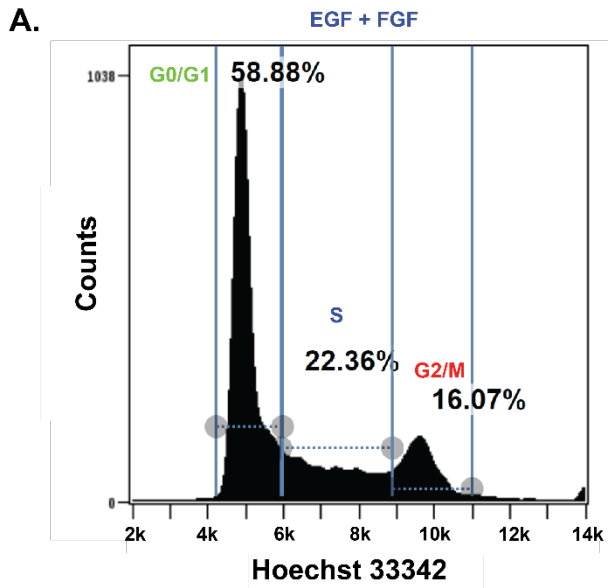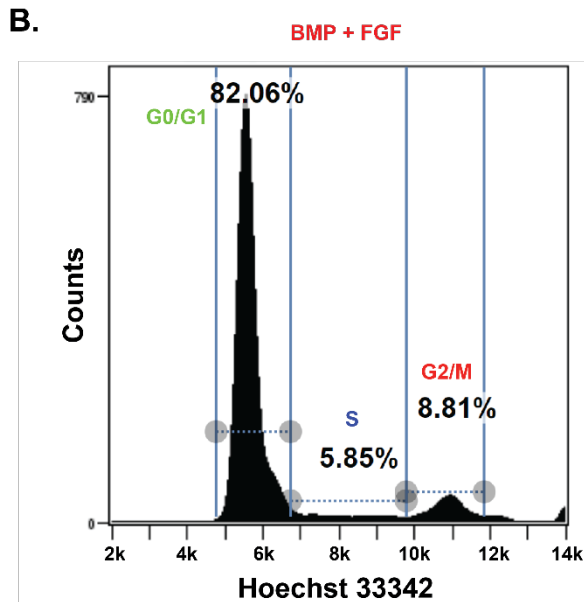

182

183 **Extended Figure 2-3: Gates for determining phases of cell cycle.** (A) Histogram of E15.5 NSCs cultured for  
 184 24 hours in media containing EGF/FGF stained with Hoechst 33342. The G0/G1 gate depicts 2n cells and  
 185 the G2/M gate depicts 4n cells. (B) Histogram of E15.5 NSCs cultured for 24 hours in media containing  
 186 BMP4/FGF stained with Hoechst 33342. The G0/G1 gate depicts 2n cells and the G2/M gate depicts 4n  
 187 cells, with cells in S phase in between these two populations.

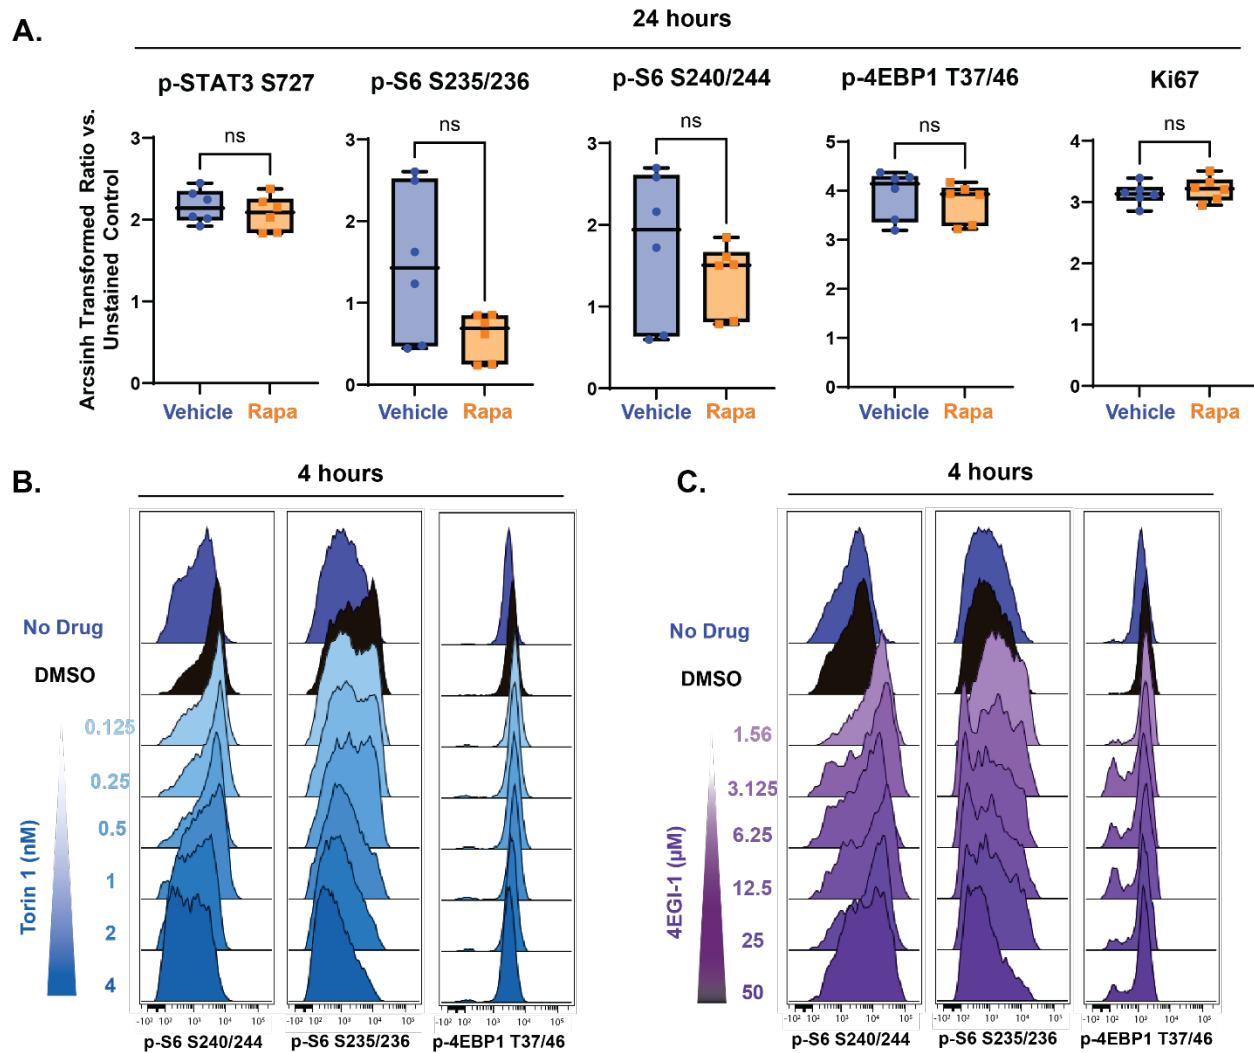

188

189 **Extended Figure 4-1: Dose response tests of various mTOR inhibitors.** (A) Quantification of proliferation  
 190 markers and effectors downstream of mTOR in E15.5 NSC cultures treated for 24 hours with media vehicle  
 191 (1X PBS, blue) or 30 nM Rapamycin (orange). For all plots, the Y axis depicts the arcsinh transformed ratio  
 192 versus column minimum for a particular antigen. A difference of 0.4 corresponds to an approximately 2-  
 193 fold difference of total protein. For all plots, error bars contact the maximum and minimum values. N = 9.  
 194 p-STAT3 S727 (unpaired two-tailed t-test  $p = 0.7921$ ), p-S6 S235/236 (unpaired two-tailed t-test  $p =$   
 195  $0.0335$ ), p-S6 S240/244 (unpaired two-tailed t-test  $p = 0.3306$ ), p-4EBP1 (unpaired two-tailed t-test  $p =$   
 196  $0.9630$ ), and Ki67 (unpaired two-tailed t-test  $p = 0.6177$ ). (B) Representative histograms downstream  
 197 effectors of mTOR from a dose-response experiment comparing E15.5 NSCs untreated (blue) to E15.5

198 NSCs treated with DMSO (0.06%, black) or Torin 1 (0.125 – 4 nM, blue). (C) Representative histograms  
199 downstream effectors of mTOR from a dose-response experiment comparing E15.5 NSCs untreated (blue)  
200 to E15.5 NSCs treated with DMSO (0.1%, black) or 4EGI-1 (1.56 – 50 nM, blue).

201
